# Supplementary material
Source: Research Square preprint supplement (doi:10.21203/rs.3.rs-9578106/v1)

**Table S1. List of Antibodies**

| **Antibody** | **Source (catalog)** |
| --- | --- |
| S1PR1/EDG1 | Proteintech(55133-1-AP) |
| MCU/CCDC109A | Proteintech(86274-1-RR) |
| MT-ND1 | Servicebio(GB113284-100) |
| SDHB | ZENBIO(R381845) |
| MT-CO2 | Selleck(F2349) |
| UQCRC2 | Selleck(F1592) |
| STIM1 | ZENBIO(R25821) |
| COX4 | ZENBIO(T200147) |
| IL-33 | Proteintech(12372-1-AP) |
| IL-6 | Affinity(DF6087) |
| CD80 | Abmart(A0N0P2) |
| CD163 | Abmart(T56845S |
| NF-κB p65 | Proteintech(D3DUU0) |
| GAPDH | Servicebio (GB15002-100) |
| β-actin | Servicebio(GB15003-100) |
| Goat Anti-Mouse IgG (H+L) FITC | Affinity(S0007) |
| Goat Anti-Rabbit IgG (H+L) Fluor594 | Affinity(S0006) |

**Table S2. List of primers for qPCR**

| **Human**  **Gene** | **Sequence (5‘-3’)** | |
| --- | --- | --- |
| S1PR1 | Forward | 5'-TCATCGTCCGGCATTACAACTA-3' |
|  | Reverse | 5'-GAGTGAGCTTGTAGGTGGTG-3' |
| S1PR2 | Forward | 5'-ATGGGCAGCTTGTACTCGGAG-3' |
|  | Reverse | 5'-CAGCCAGCAGACGATAAAGAC -3' |
| S1PR3 | Forward | 5'-CTTGGTCATCTGCAGCTTCATC-3' |
|  | Reverse | 5'-TGCTGATGCAGAAGGCAATGTA-3' |
| S1PR4 | Forward | 5'-GACGCTGGGTCTACTATTGCC-3' |
|  | Reverse | 5'-CCTCCCGTAGGAACCACTG-3' |
| S1PR5 | Forward | 5'-GTGAGGTGGGAGCCATAGAA-3' |
|  | Reverse | 5'-TTGGCTGAGTCTCCCAGAGT-3' |
| CXCL14 | Forward | 5'-GGAAATGAAGCCAAAGTACCC-3' |
|  | Reverse | 5'-AGGCGTTGTACCACTTGATGA-3' |
| TGFβR2 | Forward | 5'-CAGAAATCCTGCATGAGC-3' |
|  | Reverse | 5'-GCAGCATCTTCCAGAATAAAG -3' |
| IL-33 | Forward | 5'-AGCAAAGTGGAAGAACACAGC-3' |
|  | Reverse | 5'-CTTCTTTGGCCTTCTGTTGG-3' |
| CXCL12 | Forward | 5'-ATGAACGCCAAGGTCGTG-3' |
|  | Reverse | 5'-CTTCGGGTCAATGCACACTT-3' |
| CXCL8 | Forward | 5'-ATACTCCAAACCTTTCCACCC-3' |
|  | Reverse | 5'-TCTGCACCCAGTTTTCCTTG-3' |
| LEP | Forward | 5'-GTGGCTTTGGCCCTATCTT-3' |
|  | Reverse | 5'-GCATACTGGTGAGGATCTGTTG-3' |
| IL-6 | Forward | 5'-GTAGCCGCCCCACACAGA-3' |
|  | Reverse | 5'-CATGTCTCCTTTCTCAGGGCTG-3' |
| TGFβR1 | Forward | 5'-TGGAGCCTGGACACGCAGTA-3' |
|  | Reverse | 5'-GCCCGGGTTATGCTGGTTG-3' |
| CCL21 | Forward | 5'-GCTATCCTGTTCTTGCCCCG-3' |
|  | Reverse | 5'-CCTTTCTTGCCAGTCTTGGAGG-3' |
| HMGB1 | Forward | 5'-GGCCTTCTTCCTCTTCTGCT-3' |
|  | Reverse | 5'-GCAACATCACCAATGGACAG-3' |

**Tables S3 Primer sequence for ChIP-qPCR(Human)**

| **Target gene** | **Sequence (5‘-3’)** | |
| --- | --- | --- |
| IL-6 | Forward  Reverse | TGGCAGCACAAGGCAAAC  TTCAGCCCACTTAGAGGAGGTTG |
| IL-33 | Forward  Reverse | TCCTCAGTATTTGCAAGAATTCCC  GGAGGGGTGACAAGTAACAGC |

**Table S4. shRNA Sequences for S1PR1 Knockdown**

| **MOUSE**  **shRNA ID** | **Sequence (5‘-3’)** | | **Oligo length（nt)** |
| --- | --- | --- | --- |
| sh-S1PR1-1 | Forward | GATCCGACCTGTGACATCCTGTACAACTTCCTGTCAGATTGTACAGGATGTCACAGGTCTTTTTG | 65 |
|  | Reverse | AATTCAAAAAGACCTGTGACATCCTGTACAATCTGACAGGAAGTTGTACAGGATGTCACAGGTCG | 65 |
| sh-S1PR1-2 | Forward | GATCCCATGGAATTTAGCCGCAGCAACTTCCTGTCAGATTGCTGCGGCTAAATTCCATGTTTTTG | 65 |
|  | Reverse | AATTCAAAAACATGGAATTTAGCCGCAGCAATCTGACAGGAAGTTGCTGCGGCTAAATTCCATGG | 65 |
| sh-S1PR1-3 | Forward | GATCCCCATGTAAACTGGGTCAAGTTCTTCCTGTCAGAAACTTGACCCAGTTTACATGGTTTTTG | 65 |
|  | Reverse | AATTCAAAAACCATGTAAACTGGGTCAAGTTTCTGACAGGAAGAACTTGACCCAGTTTACATGGG | 65 |

**Table S5. siRNA Sequences for S1PR1 Knockdown**

| **Human**  **siRNA ID** | **Sequence (5‘-3’)** | | **Length(nt)** |
| --- | --- | --- | --- |
| si-S1PR1-1 | sense  antisense | caguuuaaugcuguucucc  ggagaacagcattaaactg | 19  19 |
| si-S1PR1-2 | sense  antisense | agacauaauggucucuggg  cccagagaccattatgtct | 19  19 |
| si-S1PR1-3 | sense  antisense | uaggaagaagaguugacgu  acgtcaactcttcttccta | 19  19 |

**Figure S1.** Comparative molecular docking analyses of candidate traditional Chinese medicine–derived compounds targeting S1PR1.

**
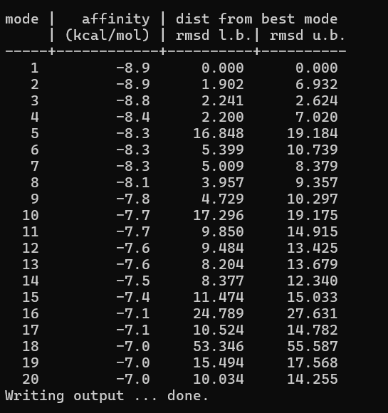
**


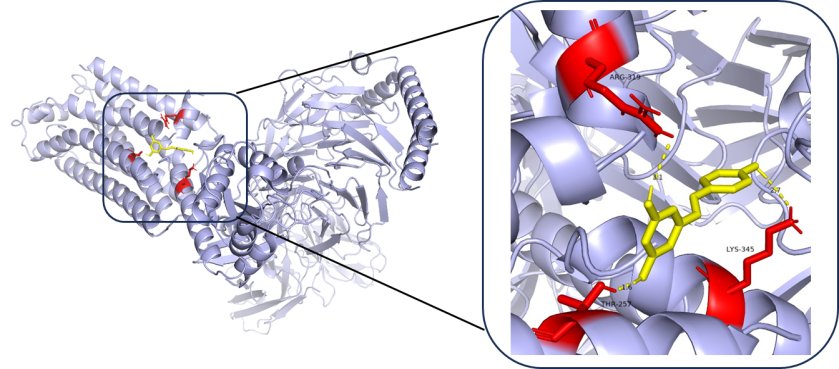


The S1PR1 protein is shown in purple, quercetin in yellow, and key interacting amino acid residues (ARG-149, TYR-58, MET-100, HIS-213, and ARG-313) in red. Yellow dashed lines indicate hydrogen bond interactions, with bond lengths labeled.


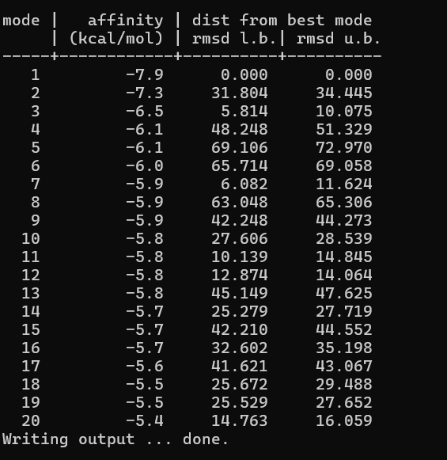

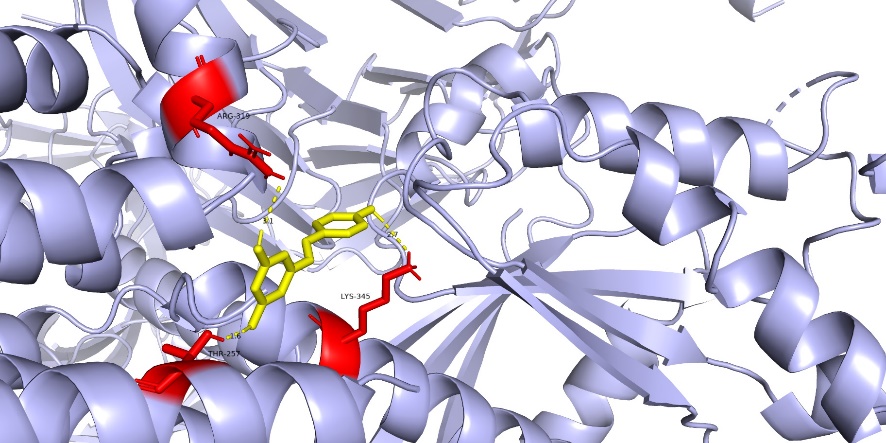


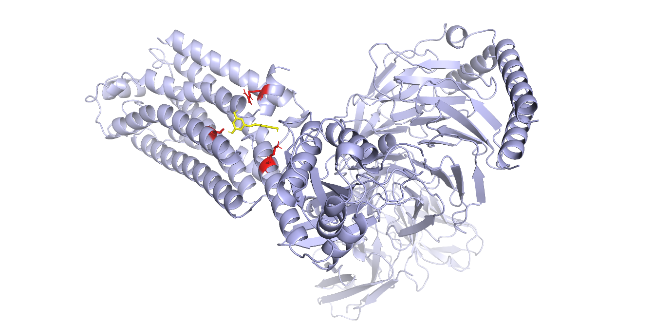


The S1PR1 protein is shown in purple, resveratrol in yellow, and key interacting amino acid residues (ARG-319, THR-257, and LYS-345) in red. Yellow dashed lines indicate hydrogen bond interactions, with bond lengths labeled.


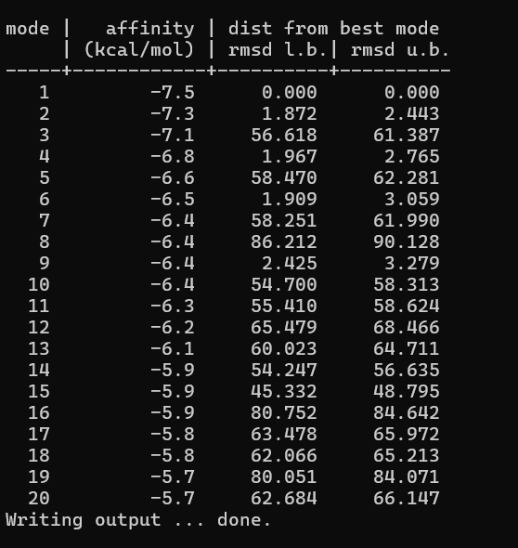


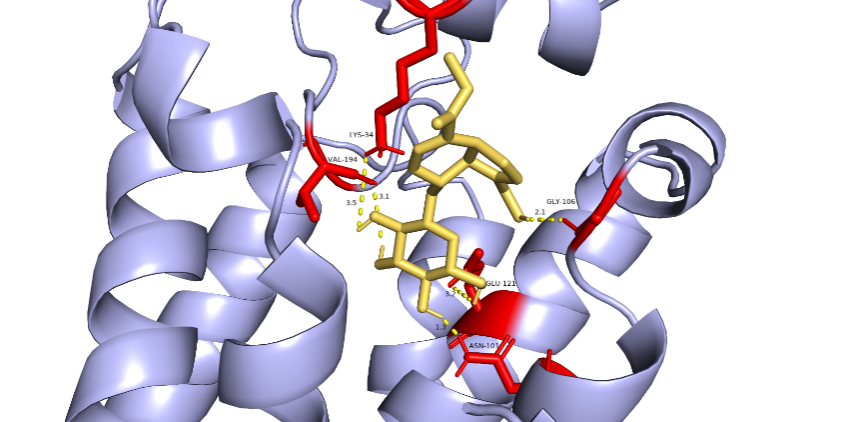

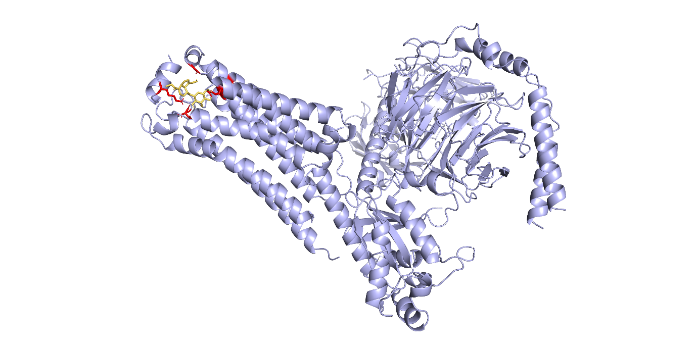


The S1PR1 protein is shown in purple, geniposide in yellow, and key interacting amino acid residues (LYS-34, VAL-194, ASN-101, GLU-121, and GLY-106) in red. Yellow dashed lines indicate hydrogen bond interactions, with bond lengths labeled.


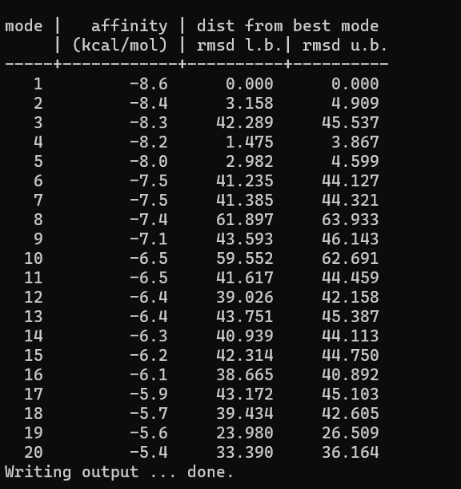

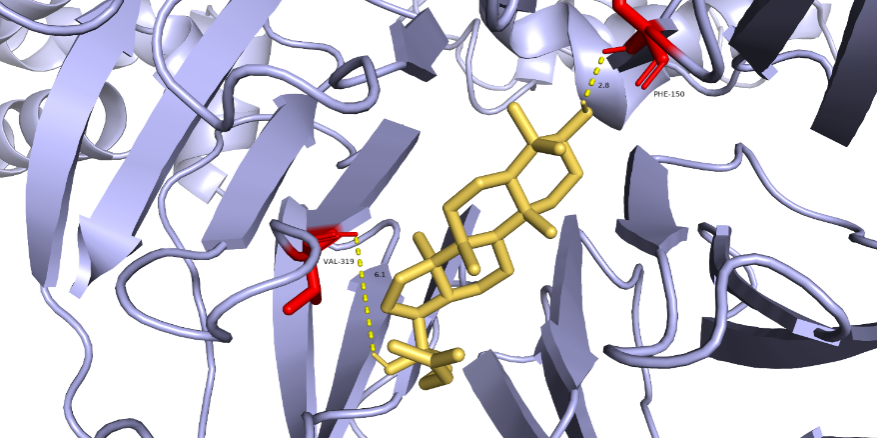


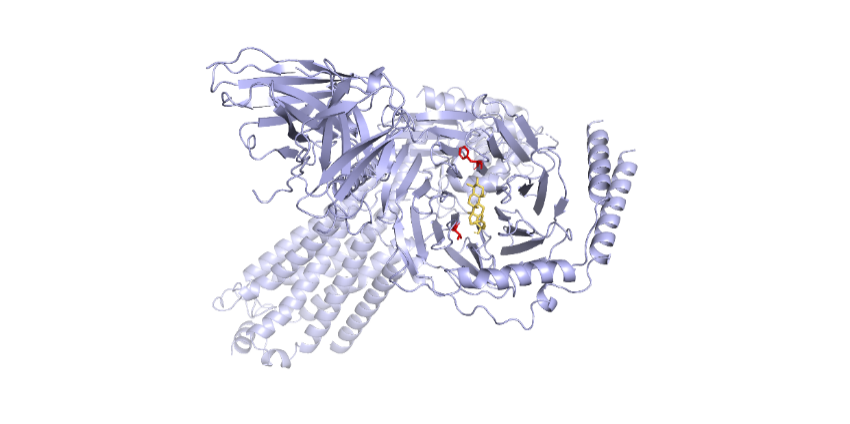


Ginsenosides are shown in yellow, and key interacting amino acid residues (PHE-150 and VAL-319) are shown in red. Yellow dashed lines indicate hydrogen bond interactions, with bond lengths labeled.

**Figure S2.** Confirmation of efficient S1PR1 knockdown in EMT-6 cells used for in vivo studies.


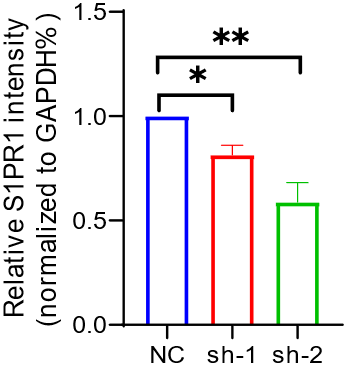

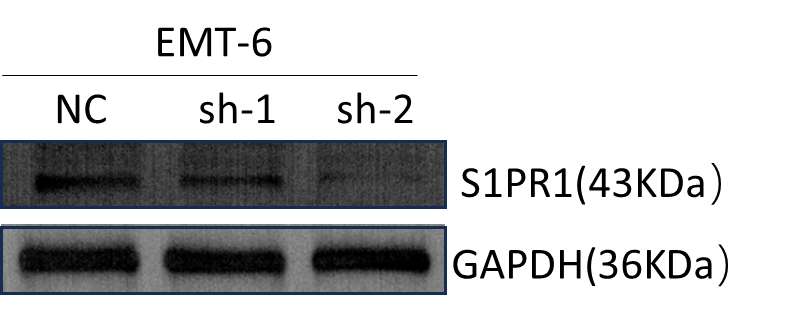

Supplement: Supplementary file 1 [file 8a45b1c2896099e227d33482.docx]
